# Supplementary material
Source: PubMed Central journal article supplement (PMC6003856)
Supplement: NIHMS972128-supplement-Supplement.pdf [file NIHMS972128-supplement-Supplement.pdf]

Table S1. Dynamic range, linearity, accuracy, and precision of eicosanoids in human BALF.

| Analytes ID | Dynamic Range (ng/mL) | LLOQ (0.2 ng/mL) |       | LQC (1ng/mL) |       | MQC (30ng/mL) |       | HQC (100ng/mL) |       | ULOQ (500ng/mL) |       |
|-------------|-----------------------|------------------|-------|--------------|-------|---------------|-------|----------------|-------|-----------------|-------|
|             |                       | Accuracy         | % RSD | Accuracy     | % RSD | Accuracy      | % RSD | Accuracy       | % RSD | Accuracy        | % RSD |
| 1           | 0.2-500               | 93               | 18    | 102          | 15    | 104           | 4     | 113            | 7     | 107             | 5     |
| 3           | 0.2-500               | 114              | 5     | 113          | 4     | 106           | 5     | 108            | 3     | 90              | 4     |
| 4           | 0.2-500               | 107              | 15    | 98           | 5     | 103           | 4     | 97             | 3     | 95              | 5     |
| 6           | 0.2-500               | 95               | 8     | 96           | 11    | 103           | 2     | 101            | 2     | 107             | 6     |
| 7           | 0.2-500               | 96               | 9     | 94           | 13    | 97            | 8     | 89             | 6     | 86              | 4     |
| 14          | 0.2-500               | 97               | 8     | 85           | 10    | 94            | 6     | 92             | 3     | 96              | 2     |
| 17          | 0.2-500               | 101              | 10    | 93           | 5     | 103           | 2     | 100            | 4     | 104             | 4     |
| 18          | 0.2-500               | 98               | 6     | 100          | 12    | 104           | 4     | 95             | 2     | 86              | 5     |
| 19          | 0.2-500               | 93               | 10    | 97           | 7     | 104           | 3     | 96             | 3     | 95              | 4     |
| 20          | 0.2-500               | 97               | 7     | 99           | 8     | 99            | 4     | 92             | 3     | 86              | 4     |
| 21          | 0.2-500               | 98               | 15    | 105          | 8     | 110           | 3     | 91             | 2     | 91              | 5     |
| 22          | 0.2-500               | 112              | 7     | 97           | 9     | 98            | 3     | 91             | 3     | 97              | 5     |
| 23          | 0.2-500               | 111              | 4     | 105          | 3     | 100           | 2     | 94             | 1     | 97              | 1     |
| 24          | 0.2-500               | 109              | 13    | 107          | 8     | 115           | 3     | 114            | 6     | 106             | 4     |
| 28          | 0.2-500               | 113              | 13    | 100          | 7     | 97            | 2     | 91             | 2     | 85              | 3     |
| 29          | 0.2-500               | 104              | 15    | 94           | 6     | 99            | 3     | 92             | 3     | 91              | 5     |
| 30          | 0.2-500               | 109              | 6     | 105          | 7     | 110           | 2     | 92             | 4     | 70              | 4     |
| 31          | 0.2-500               | 103              | 9     | 86           | 3     | 88            | 4     | 93             | 4     | 108             | 6     |
| 32          | 0.2-500               | 103              | 5     | 92           | 6     | 96            | 4     | 88             | 4     | 85              | 2     |
| 33          | 0.2-500               | 111              | 5     | 89           | 3     | 102           | 3     | 96             | 1     | 86              | 5     |
| 34          | 0.2-500               | 100              | 4     | 94           | 14    | 94            | 1     | 90             | 1     | 101             | 2     |
| 35          | 0.2-500               | 107              | 17    | 92           | 8     | 95            | 3     | 107            | 5     | 115             | 4     |
| 36          | 0.2-500               | 110              | 6     | 98           | 4     | 103           | 4     | 97             | 2     | 85              | 3     |
| 37          | 0.2-500               | 92               | 9     | 99           | 5     | 104           | 3     | 107            | 4     | 109             | 5     |
| 38          | 0.2-500               | 105              | 12    | 105          | 7     | 101           | 6     | 110            | 4     | 115             | 1     |
| 39          | 0.2-500               | 103              | 13    | 100          | 7     | 99            | 3     | 102            | 3     | 109             | 4     |
| 40          | 0.2-500               | 110              | 15    | 102          | 13    | 95            | 2     | 99             | 3     | 113             | 2     |

|    |               |               |    |              |    |               |   |                |   |                 |   |
|----|---------------|---------------|----|--------------|----|---------------|---|----------------|---|-----------------|---|
| 44 | 0.2-500       | 92            | 12 | 98           | 6  | 95            | 2 | 90             | 3 | 107             | 3 |
| 45 | 0.2-500       | 93            | 18 | 102          | 15 | 104           | 4 | 113            | 7 | 107             | 5 |
|    | Dynamic Range | LLOQ (1ng/mL) |    | LQC (3ng/mL) |    | MQC (30ng/mL) |   | HQC (100ng/mL) |   | ULOQ (500ng/mL) |   |
| 9  | 1-500         | 90            | 7  | 112          | 9  | 109           | 6 | 94             | 5 | 85              | 6 |
| 10 | 1-500         | 93            | 14 | 115          | 2  | 112           | 3 | 98             | 2 | 85              | 7 |
| 11 | 1-500         | 95            | 8  | 106          | 10 | 101           | 5 | 115            | 8 | 114             | 4 |
| 12 | 1-500         | 93            | 11 | 103          | 6  | 104           | 5 | 120            | 5 | 109             | 7 |
| 13 | 1-500         | 106           | 9  | 108          | 5  | 97            | 8 | 114            | 8 | 115             | 4 |

Table S2. Dynamic range, linearity, accuracy, and precision of eicosanoids in human sputum.

| Analytes ID | Dynamic Range (ng/mL) | LLOQ (0.2 ng/mL) |       | LQC (1ng/mL) |       | MQC (30ng/mL) |       | HQC (100ng/mL) |       | ULOQ (500ng/mL) |       |
|-------------|-----------------------|------------------|-------|--------------|-------|---------------|-------|----------------|-------|-----------------|-------|
|             |                       | Accuracy         | % RSD | Accuracy     | % RSD | Accuracy      | % RSD | Accuracy       | % RSD | Accuracy        | % RSD |
| 1           | 0.2-500               | 95               | 15    | 108          | 5     | 100           | 3     | 103            | 1     | 94              | 3     |
| 3           | 0.2-500               | 112              | 12    | 111          | 4     | 96            | 3     | 95             | 3     | 87              | 5     |
| 4           | 0.2-500               | 103              | 10    | 101          | 6     | 93            | 5     | 95             | 3     | 95              | 4     |
| 6           | 0.2-500               | 113              | 6     | 103          | 6     | 92            | 2     | 96             | 2     | 107             | 1     |
| 7           | 0.2-500               | 95               | 12    | 97           | 11    | 93            | 4     | 92             | 2     | 107             | 3     |
| 17          | 0.2-500               | 112              | 8     | 100          | 4     | 89            | 3     | 93             | 2     | 109             | 3     |
| 18          | 0.2-500               | 92               | 27    | 103          | 15    | 104           | 3     | 102            | 2     | 88              | 3     |
| 19          | 0.2-500               | 109              | 6     | 110          | 5     | 99            | 2     | 97             | 3     | 99              | 3     |
| 20          | 0.2-500               | 111              | 5     | 106          | 5     | 96            | 2     | 98             | 2     | 102             | 3     |
| 21          | 0.2-500               | 115              | 9     | 94           | 6     | 85            | 3     | 105            | 6     | 112             | 4     |
| 22          | 0.2-500               | 112              | 11    | 100          | 12    | 97            | 3     | 98             | 1     | 111             | 2     |
| 23          | 0.2-500               | 93               | 9     | 112          | 3     | 96            | 11    | 92             | 1     | 96              | 2     |
| 24          | 0.2-500               | 112              | 16    | 98           | 4     | 100           | 4     | 94             | 3     | 106             | 2     |
| 28          | 0.2-500               | 106              | 4     | 102          | 11    | 97            | 1     | 97             | 3     | 99              | 3     |
| 29          | 0.2-500               | 102              | 5     | 98           | 3     | 94            | 2     | 97             | 2     | 107             | 2     |
| 30          | 0.2-500               | 95               | 9     | 105          | 5     | 101           | 3     | 96             | 2     | 85              | 1     |
| 31          | 0.2-500               | 100              | 10    | 87           | 4     | 87            | 3     | 92             | 1     | 110             | 3     |
| 32          | 0.2-500               | 114              | 5     | 102          | 7     | 93            | 6     | 94             | 3     | 94              | 4     |
| 33          | 0.2-500               | 112              | 2     | 100          | 2     | 99            | 3     | 100            | 2     | 93              | 4     |
| 34          | 0.2-500               | 92               | 80    | 90           | 6     | 102           | 12    | 99             | 2     | 112             | 2     |
| 35          | 0.2-500               | 115              | 3     | 103          | 2     | 96            | 2     | 97             | 1     | 91              | 2     |
| 37          | 0.2-500               | 111              | 7     | 101          | 6     | 93            | 2     | 96             | 1     | 106             | 2     |
| 38          | 0.2-500               | 111              | 10    | 100          | 4     | 100           | 12    | 98             | 3     | 104             | 1     |
| 39          | 0.2-500               | 95               | 9     | 98           | 5     | 99            | 3     | 104            | 2     | 106             | 1     |
| 40          | 0.2-500               | 99               | 7     | 98           | 11    | 96            | 10    | 98             | 2     | 110             | 1     |
| 44          | 0.2-500               | 99               | 10    | 93           | 4     | 93            | 1     | 92             | 2     | 115             | 4     |
| 45          | 0.2-500               | 95               | 15    | 108          | 5     | 100           | 3     | 103            | 1     | 94              | 3     |

|    | Dynamic Range (ng/mL) | LLOQ (1ng/mL) |    | LQC (3ng/mL) |    | MQC (30ng/mL) |   | HQC (100ng/mL) |   | ULOQ (500ng/mL) |   |
|----|-----------------------|---------------|----|--------------|----|---------------|---|----------------|---|-----------------|---|
|    |                       |               |    |              |    |               |   |                |   |                 |   |
| 14 | 1-500                 | 102           | 13 | 114          | 4  | 115           | 4 | 92             | 6 | 93              | 2 |
| 36 | 1-500                 | 88            | 12 | 105          | 11 | 92            | 4 | 98             | 7 | 112             | 3 |
| 9  | 1-500                 | 92            | 12 | 114          | 6  | 112           | 4 | 99             | 5 | 88              | 3 |
| 10 | 1-500                 | 105           | 7  | 101          | 5  | 112           | 2 | 97             | 4 | 86              | 1 |
| 11 | 1-500                 | 103           | 5  | 100          | 3  | 107           | 5 | 102            | 5 | 93              | 2 |
| 12 | 1-500                 | 106           | 5  | 108          | 5  | 115           | 4 | 102            | 5 | 85              | 4 |
| 13 | 1-500                 | 109           | 4  | 104          | 5  | 110           | 3 | 103            | 4 | 94              | 3 |

Table S3. Dynamic range, linearity, accuracy, and precision of eicosanoids in 10x diluted charcoal stripped serum.

| Analytes ID | Dynamic Range (ng/mL) | LLOQ (0.2 ng/mL) |       | LQC (1ng/mL) |       | MQC (30ng/mL) |       | HQC (100ng/mL) |       | ULOQ (500ng/mL) |       |
|-------------|-----------------------|------------------|-------|--------------|-------|---------------|-------|----------------|-------|-----------------|-------|
|             |                       | Accuracy         | % RSD | Accuracy     | % RSD | Accuracy      | % RSD | Accuracy       | % RSD | Accuracy        | % RSD |
| 1           | 0.2-500               | 89               | 11    | 90           | 6     | 93            | 3     | 103            | 4     | 107             | 5     |
| 4           | 0.2-500               | 105              | 14    | 100          | 4     | 103           | 4     | 98             | 3     | 87              | 3     |
| 6           | 0.2-500               | 93               | 11    | 101          | 9     | 98            | 4     | 100            | 4     | 101             | 3     |
| 7           | 0.2-500               | 106              | 6     | 99           | 3     | 101           | 2     | 104            | 3     | 111             | 3     |
| 14          | 0.2-500               | 105              | 6     | 95           | 10    | 85            | 3     | 107            | 6     | 110             | 10    |
| 17          | 0.2-500               | 109              | 9     | 100          | 8     | 93            | 3     | 94             | 3     | 108             | 3     |
| 18          | 0.2-500               | 93               | 12    | 96           | 6     | 96            | 2     | 100            | 3     | 115             | 3     |
| 20          | 0.2-500               | 98               | 9     | 94           | 8     | 100           | 4     | 97             | 3     | 98              | 3     |
| 21          | 0.2-500               | 95               | 15    | 91           | 10    | 98            | 2     | 99             | 4     | 103             | 4     |
| 22          | 0.2-500               | 103              | 9     | 89           | 4     | 92            | 3     | 100            | 2     | 109             | 4     |
| 24          | 0.2-500               | 96               | 12    | 101          | 3     | 100           | 2     | 100            | 1     | 106             | 1     |
| 28          | 0.2-500               | 104              | 8     | 85           | 8     | 99            | 3     | 100            | 2     | 106             | 4     |
| 29          | 0.2-500               | 93               | 9     | 94           | 11    | 102           | 3     | 99             | 5     | 103             | 3     |
| 30          | 0.2-500               | 110              | 9     | 99           | 4     | 96            | 3     | 97             | 2     | 105             | 4     |
| 31          | 0.2-500               | 102              | 13    | 115          | 3     | 103           | 2     | 96             | 3     | 78              | 8     |
| 32          | 0.2-500               | 106              | 10    | 89           | 3     | 94            | 2     | 103            | 3     | 113             | 5     |
| 33          | 0.2-500               | 104              | 10    | 104          | 7     | 96            | 6     | 102            | 3     | 89              | 6     |
| 34          | 0.2-500               | 99               | 9     | 94           | 4     | 100           | 4     | 101            | 2     | 96              | 3     |
| 35          | 0.2-500               | 105              | 12    | 89           | 14    | 95            | 3     | 95             | 2     | 107             | 2     |
| 36          | 0.2-500               | 106              | 9     | 94           | 11    | 87            | 7     | 101            | 9     | 95              | 4     |
| 37          | 0.2-500               | 107              | 5     | 96           | 6     | 98            | 3     | 100            | 3     | 97              | 3     |
| 38          | 0.2-500               | 113              | 11    | 97           | 6     | 93            | 2     | 96             | 1     | 107             | 1     |
| 39          | 0.2-500               | 113              | 9     | 104          | 6     | 94            | 5     | 102            | 3     | 111             | 3     |
| 44          | 0.2-500               | 100              | 10    | 93           | 8     | 94            | 4     | 97             | 2     | 107             | 3     |
| 45          | 0.2-500               | 102              | 10    | 98           | 8     | 99            | 2     | 101            | 2     | 115             | 2     |

|    | Dynamic Range (ng/mL) | LLOQ (1ng/mL) |    | LQC (3ng/mL) |   | MQC (30ng/mL) |   | HQC (100ng/mL) |   | ULOQ (500ng/mL) |   |
|----|-----------------------|---------------|----|--------------|---|---------------|---|----------------|---|-----------------|---|
|    |                       |               |    |              |   |               |   |                |   |                 |   |
| 9  | 1-500                 | 104           | 7  | 98           | 4 | 98            | 3 | 92             | 3 | 85              | 4 |
| 10 | 1-500                 | 98            | 4  | 100          | 6 | 101           | 6 | 84             | 2 | 77              | 4 |
| 11 | 1-500                 | 104           | 6  | 96           | 5 | 98            | 3 | 95             | 2 | 85              | 5 |
| 12 | 1-500                 | 114           | 4  | 98           | 5 | 97            | 4 | 85             | 3 | 88              | 7 |
| 13 | 1-500                 | 110           | 7  | 99           | 2 | 102           | 4 | 92             | 4 | 85              | 4 |
| 19 | 1-500                 | 90            | 12 | 115          | 3 | 105           | 3 | 99             | 3 | 89              | 3 |
| 23 | 1-500                 | 103           | 9  | 99           | 8 | 92            | 2 | 91             | 2 | 102             | 2 |
| 40 | 1-500                 | 97            | 12 | 98           | 6 | 97            | 4 | 98             | 4 | 102             | 3 |
